# Supplementary material for: Cadmium preconcentration with bean-coat as a green adsorbent with detection by electrothermal atomic absorption spectrometry
Source: Royal Society of Chemistry journal article supplement (doi:10.1039/c0ja00265h), 2011-01-01
Supplement: c0ja00265h.pdf [file c0ja00265h.pdf]

## **Cadmium preconcentration with bean-coat as a green adsorbent with detection by electrothermal atomic absorption spectrometry**

Yong Tian, Zhao-Ming Xie, Ming-Li Chen\*, Jian-Hua Wang\*  
Research Center for Analytical Sciences, Northeastern University, Box 332,  
Shenyang 110819, China

## Supporting Information

**Table S1.** The temperature program of the microwave digestion system.

| Step | Temp.<br>(°C) | Pressure<br>(atm) | Time<br>(min) | Power<br>(W) |
|------|---------------|-------------------|---------------|--------------|
| 1    | 150           | 10                | 4             | 600          |
| 2    | 170           | 15                | 3             | 600          |
| 3    | 190           | 22                | 3             | 600          |
| 4    | 210           | 30                | 5             | 600          |

**Table S2.** Temperature program of the ETAAS instrument for cadmium detection.

| Step        | Start Temp.<br>(°C) | End Temp.<br>(°C) | Ramp<br>(s) | Hold<br>(s) | Argon flow<br>(mL min <sup>-1</sup> ) |
|-------------|---------------------|-------------------|-------------|-------------|---------------------------------------|
| Drying      | 80                  | 140               | 40          | 0           | 200                                   |
| Pyrolysis   | 300                 | 300               | 0           | 20          | 200                                   |
| Atomization | 1500                | 1500              | 0           | 3           | 10                                    |
| Cleaning    | 1500                | 1800              | 1           | 0           | 200                                   |

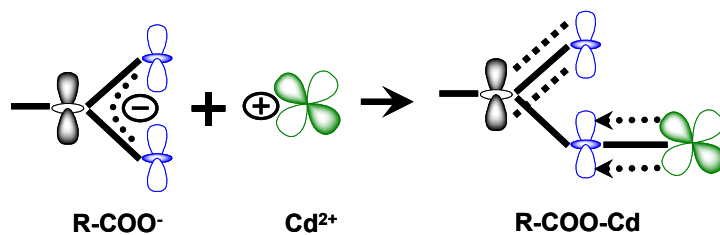

**Fig. S1.** The potential mechanism for the adsorption of Cd<sup>2+</sup> via coordinative interaction with the carboxylic group on the mungbean-coat.

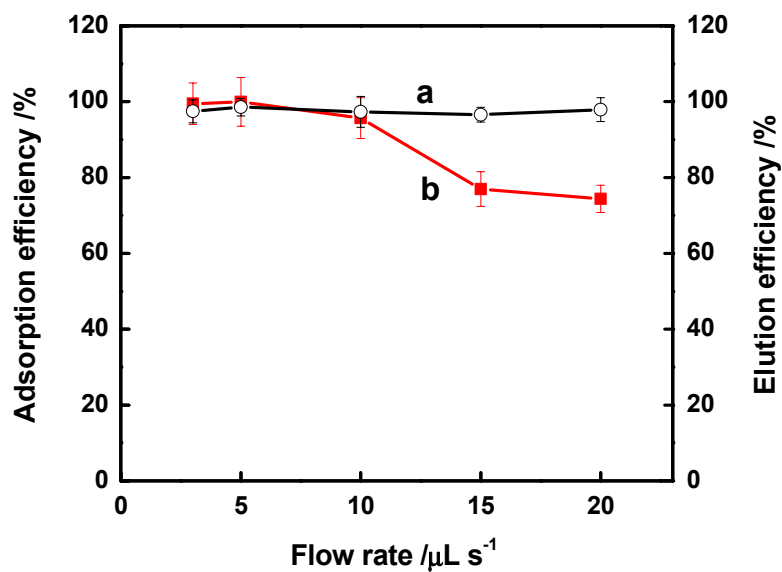

**Fig. S2.** The dependences of adsorption and elution efficiencies on the sample loading and elution flow rates. The experimental conditions are given in [Table 1](#) and the ETAAS temperature program is illustrated in [Table S2](#). (a) Sample loading flow rate, (b) Elution flow rate.
